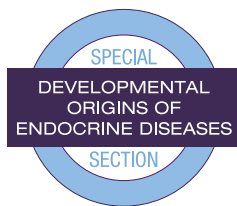

## Prenatal Stress, Glucocorticoids, and Developmental Programming of the Stress Response

Patrick O. McGowan<sup>1,2,3,4</sup> and Stephen G. Matthews<sup>4,5,6</sup>

<sup>1</sup>Department of Biological Sciences and Center for Environmental Epigenetics and Development, University of Toronto, Scarborough Campus, Toronto, Ontario M1C 1A4, Canada; <sup>2</sup>Department of Cell and Systems Biology, University of Toronto, Toronto, Ontario M5S 3G5, Canada; <sup>3</sup>Department of Psychology, University of Toronto, Toronto, Ontario M5S 3G5, Canada; <sup>4</sup>Department of Physiology, University of Toronto, Toronto, Ontario M5S 1A8, Canada; <sup>5</sup>Departments of Obstetrics & Gynaecology and Medicine, University of Toronto, Toronto, Ontario M5G 1E2, Canada; and <sup>6</sup>Lunenfeld Tanenbaum Research Institute, Sinai Health System, Toronto, Ontario M5G 1X5, Canada

The early environment has a major impact on the developing embryo, fetus, and infant. Parental adversity (maternal and paternal) and glucocorticoid exposure before conception and during pregnancy have profound effects on the development and subsequent function of the hypothalamic-pituitary-adrenal axis and related behaviors. These effects are species-, sex-, and age-specific and depend on the timing and duration of exposure. The impact of these early exposures can extend across multiple generations, via both the maternal and paternal lineage, and recent studies have begun to determine the mechanisms by which this occurs. Improved knowledge of the mechanisms by which adversity and glucocorticoids program stress systems will allow development of strategies to ameliorate and/or reverse these long-term effects. (*Endocrinology* 159: 69–82, 2018)

There is now extensive evidence from both human and animal studies that maternal adversity during pregnancy can lead to long-term physiological and pathophysiological outcomes in offspring. There has also been considerable research focus placed on determining the routes and mechanisms by which maternal adversity mediates effects in the developing fetus. In this context, maternal adversity (stress, anxiety, and depression) has been associated with increased maternal and fetal glucocorticoid concentrations. The role of glucocorticoids in mediating the long-term developmental programming has also been of particular interest because synthetic glucocorticoids are administered in human pregnancy, in both the management of congenital adrenal hyperplasia and threatened preterm birth, with the latter occurring in >10% of all pregnancies (1). Although increased fetal and placental glucocorticoid exposure represents an important route of transmission of the effects of maternal adversity to the fetus, there are likely a number of other mediating factors (2). The maternal and uterine

environments are critical in modulating fetal development and long-term outcomes; however, more recent research has highlighted an important role of paternal adversity before conception in modulating endocrine, metabolic, and neurodevelopmental outcomes in offspring. Although the field of adversity- and glucocorticoid-mediated developmental programming has been reviewed extensively in recent years, a number of important findings pertaining to long-term consequences of parental adversity and fetal glucocorticoid exposure on health across the life course are emerging. These include major sex differences in outcomes, the transgenerational nature of perinatal programming, the role of the father, and the genetic/epigenetic mechanisms involved. This review will focus on these areas as well as the most recent publications in the field (past 5 years).

### The Hypothalamic-Pituitary-Adrenal Axis

The hypothalamic-pituitary-adrenal (HPA) axis plays a key role in the regulation homeostasis and the response to

stress. It also plays a role in the modulation of cardiovascular, metabolic, reproductive, and neurologic function (3–5). During the stress response, the hypothalamic paraventricular nucleus (PVN) initiates an endocrine cascade with the release of corticotropin-releasing hormone (CRH) and arginine vasopressin that trigger the synthesis of Pro-opiomelanocortin [the precursor of adrenocorticotropic hormone (ACTH)] (Fig. 1). ACTH is released from the anterior pituitary into the peripheral circulation. The adrenal cortex responds to ACTH with the release of glucocorticoids [*e.g.*, cortisol (humans), corticosterone (rats)] that act on glucocorticoid receptors and mineralocorticoid receptor at a number of levels within the axis. Activation of the hippocampus inhibits this endocrine cascade, whereas activation of the amygdala

enhances the HPA response. In this manner, glucocorticoid-sensitive brain regions refine challenges to homeostasis and adaptive responses to stress.

### HPA function: prenatal adversity

The effect of maternal adversity on HPA function in offspring, from human and animal studies, has been reviewed in detail previously (6, 7). Maternal adversity during pregnancy arising from acute/chronic stress, anxiety, and depression can result in increased levels of maternal glucocorticoid and a subsequent increase in fetal exposure. Although some studies have shown maternal depression to be associated with increased reactivity of the HPA axis (8), the association between maternal adversity and fetal glucocorticoid exposure is

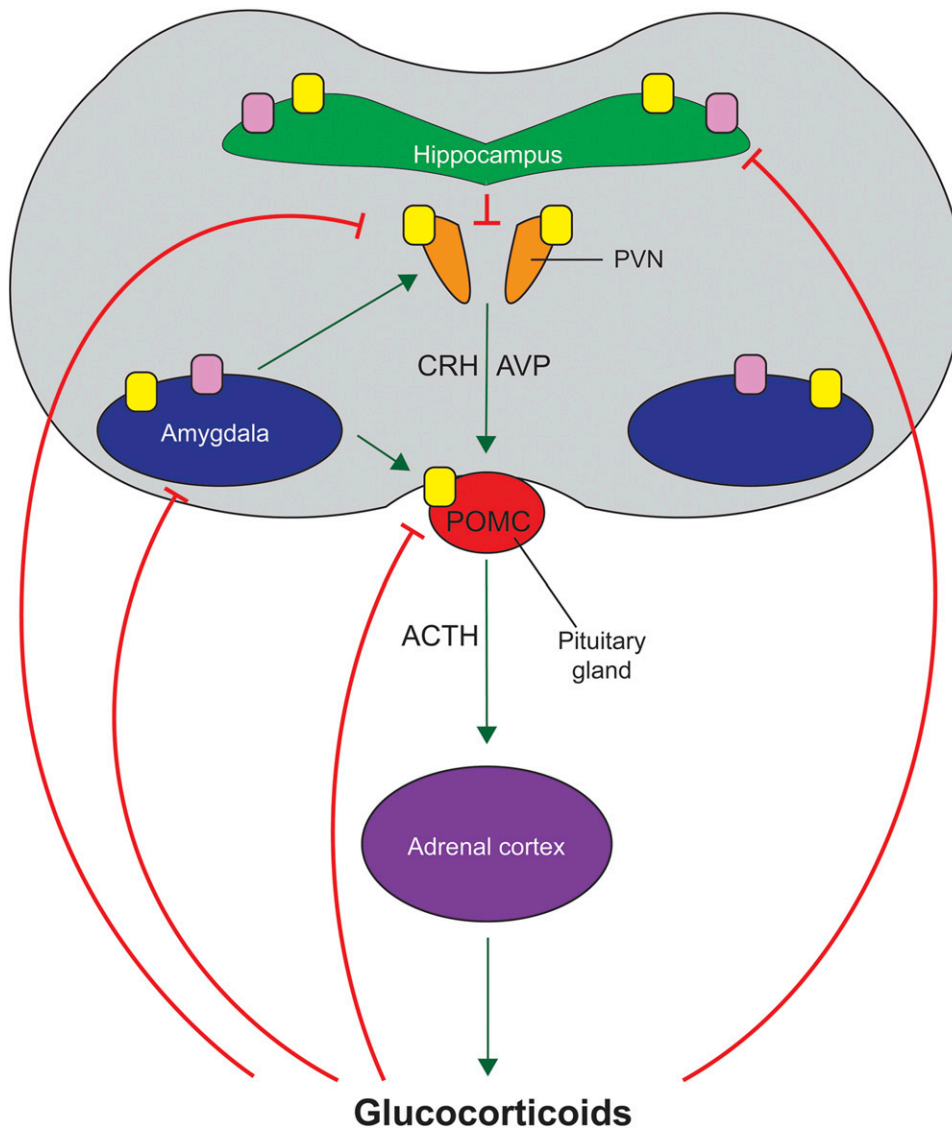

**Figure 1.** The HPA axis plays a key role in the regulation homeostasis and the response to stress. During stress, the hypothalamic PVN initiates an endocrine cascade with the release of CRH and arginine vasopressin (AVP) that trigger the synthesis of pro-opiomelanocortin (POMC; the precursor of ACTH). ACTH is released from the anterior pituitary into the peripheral circulation. The adrenal cortex responds to ACTH with the release of glucocorticoids, which act on glucocorticoid receptors (GRs; yellow boxes) and mineralocorticoid receptors (MRs; pink boxes). Activation of the hippocampus inhibits this endocrine cascade, whereas activation of the amygdala enhances the HPA response.

complex, nonlinear, and likely dependent on a number of variables. In human studies, elevated maternal cortisol during the late second and third trimesters was associated with an increased response to stress (heelstick procedure) in infants 24 hours after birth. However, in this study, there was no association between maternal anxiety and depression scores and maternal cortisol (9). Another study in infants (12 months) associated maternal anxiety with an increased cortisol response to bathing, but a reduced response to immunization and maternal separation (10). More recently, maternal depression was linked to elevated salivary cortisol responses to stress (Still Face Paradigm) at 4 months of age (11). Further, high levels of maternal subjective stress during the 2008 Iowa floods were associated with increased cortisol responses to stress in children (2.5 years); effects were confined to females and were greater if distress was experienced later in pregnancy (12). Interestingly, maternal anxiety and depression was also associated with an increase in the sympathetic nervous system response to stress, an effect that was confined to boys (13). In contrast, other studies have demonstrated that maternal anxiety in late gestation is associated with reduced HPA function in children and adolescents (13, 14). As such, it appears that the effects of maternal anxiety and depression in pregnancy on HPA function and stress responsiveness in children likely depends on; the stage of pregnancy when stress occurred; infant/child age and sex; and the context of the stressor used to activate the HPA axis.

A large number of animal studies have linked prenatal stress to subsequent HPA function in offspring. These have improved understanding of the relationship between maternal stress during pregnancy, maternal glucocorticoid concentrations, HPA function, and behaviors in offspring, as well as determining the mechanisms involved. However, there has been considerable variability in the results of these studies that likely has arisen from outcomes that are highly dependent on the nature of the exposure (type of stress, duration, time in gestation), the timing of assessment (prepubertal, peripubertal, adult, aged), sex of the offspring, and, in females, the time of the reproductive cycle when testing was undertaken.

In juvenile rhesus monkeys, maternal stress increased basal morning cortisol and decreased cortisol inhibition following dexamethasone suppression (15). In a recent study in wild chimpanzees, male, but not female offspring, of low-ranking mothers exhibited lower fecal glucocorticoid metabolite levels; effects that increased with age (16). In guinea pigs, prenatal stress in late gestation [gestational day (gd) 50 or gd60] resulted in adult male offspring that exhibited increased basal and ACTH-stimulated cortisol levels (17). In females,

prenatal stress on gd50, but not gd60, led to elevated basal cortisol levels (18). In addition, in adult females, prenatal stress resulted in a reduction in the adrenocortical response to stress in estrous, but not luteal phases of the reproductive cycle (18). In rats, daily prenatal stress over the last week of gestation led to elevated basal and activated corticosteroid responses in offspring (19–21).

### HPA function: prenatal glucocorticoid exposure

There has been considerable interest in the effects of synthetic glucocorticoid (sGC) on HPA function and behaviors from their widespread use in cases of suspected congenital adrenal hyperplasia and threatened preterm birth (1). Maternal treatment with sGC effectively decreases the incidence of neonatal respiratory morbidity and mortality. Given the difficulty in predicting preterm delivery, a considerable proportion (~30%) of women who receive a single course of sGC do not deliver within 7 days (22). This led to the routine use of weekly (multiple) courses of sGC at many centers in the late 1990s/early 2000s. At this time, and because of emergence of studies indicating potential longer term effects on other organs, particularly the brain, a National Institutes of Health update recommended restriction to a single course of sGC, except in ongoing trials (23). A very recent American College of Obstetricians and Gynecologists update recommends a single course of sGC for women presenting at risk for preterm birth between 24 and 34 weeks' gestation, and that regularly scheduled repeat courses (>two courses) are not recommended (24).

The impact of early exposure to sGC (primarily betamethasone and dexamethasone) on endocrine and neurodevelopmental outcomes has been investigated extensively in many species including humans (7). As for the situation with early adversity, effects are highly sex-, age-, and species-specific, as well as being dependent on the time in development when exposure occurs. Studies investigating the effects of prenatal sGC exposure on HPA function in humans have been significantly confounded by the presence of preterm birth (and its varied etiologies) in study populations, variability in the latency between treatment and delivery, and variability in the timing and number of doses administered. These have led to considerable variability in outcomes reported.

Human infants who received a single exposure to sGC as fetuses, but were born at term (reducing the confounding effects of prematurity), exhibited normal baseline cortisol but an increased response to stress (heelstick procedure) 24 hours after birth (25). In preterm delivered infants (~29 weeks), there was no association between a single course of sGC exposure and resting cortisol at 3, 8, and 18 months (26). However, two

studies undertaken in children born at normal term indicated long-term effects on stress responsiveness. Single-course sGC resulted in children (ages 6 to 11 years) that exhibited elevated cortisol responsiveness during the Trier Social Stress Test (TSST); an effect that was most prominent in girls (27). In the other study, children (age 10 years) born at term also exhibited an increased cortisol response to the TSST (28). In adults that were born preterm (<32 weeks) and that had received a single course of sGC, there was no difference in basal HPA function compared with adults (age 19 years; men and women) born preterm that had not received sGC, although sGC treatment was associated with increased plasma dehydroepiandrosterone and androstenedione (29). In another study in adults (age 30 years; men and women), single-course sGC did not affect basal cortisol levels, although those exposed to sGC did exhibit early markers of insulin resistance (30). No studies have investigated HPA responsiveness to challenge in adults exposed prenatally to sGC. It is critical to understand the long-term consequences of prenatal sGC on HPA function in humans born both preterm and at term. The latter group is of importance because almost 30% of pregnant women who are treated with sGC give birth at normal term (22).

A large number of studies have investigated HPA function in animal models following prenatal sGC exposure. When considering these studies, it is important to note that there are very important species differences in glucocorticoid sensitivity. Old World primates (*e.g.*, baboons, rhesus and vervet monkeys) and sheep are relatively glucocorticoid sensitive. Conversely, rats and mice are very glucocorticoid sensitive. Guinea pigs are relatively glucocorticoid resistant, whereas New World primates (*e.g.*, macaques) are extremely glucocorticoid resistant. In Old World primates, treatment with single- and multiple-course sGC resulted in offspring (born at term) that exhibited an increase in basal and activated HPA function as juveniles (31, 32). In contrast, in the New World common marmoset, multiple courses of sGC administered in early or late gestation did not modify basal pituitary-adrenocortical activity during the first year (33). Interestingly, the effects of prenatal sGC on HPA outcomes were similar between juvenile Old World primate offspring and humans. To our knowledge, there have been no studies on the impact of prenatal sGC on HPA function in adult primates.

In guinea pigs, a single course of sGC in late gestation led to a reduced cortisol stress response in young (age 18 days) males and females (34). In contrast, exposure to multiple-course sGC led to increased cortisol responsiveness to stress in female offspring (age 19 days) with a trend toward a reduction in responsiveness in

males (35). Interestingly, in another study, multiple-course sGC decreased HPA responsiveness in infant male (age 10 day), but not female guinea pigs (36). In adult male guinea pigs, multiple-course sGC resulted in a reduction in basal and stress-induced cortisol levels; this was linked to a decrease in *Crh* messenger RNA (mRNA) in the PVN and an increase in *Nr3c2* mRNA (encodes mineralocorticoid receptor) in the hippocampus (37). The latter suggests an increase in hippocampal glucocorticoid feedback sensitivity facilitating reduced HPA function (37). In adult females, prenatal sGC exposure resulted in reduced basal HPA activity, although this was only evident in the luteal phase of the reproductive cycle (37, 38). Hippocampal *Nr3c1* (encodes GR) and *Nr3c2* mRNA was elevated in sGC-exposed animals, suggesting increased glucocorticoid feedback sensitivity at this time (38). These studies suggest that the programming effects of sGC are highly dependent on sex and the age at which HPA outcomes are assessed and that there is interaction between programming and the reproductive cycle in females.

In sheep, antenatal sGC exposure resulted in altered HPA function in young offspring that was also sex- and age-dependent. Single-course sGC delivered in early gestation led to decreased basal and activated HPA function in females, but elevated HPA activity in male offspring (39). In adult sheep, sGC effects on HPA function are dose-, age-, and sex-specific. Single course sGC treatment (betamethasone) led to elevated basal and stress-activated adrenocortical function in mixed-sex offspring at 12 months of age (40), but there were no differences in HPA function at 24 months (41). In another study, single-course dexamethasone treatment at a similar stage of gestation increased basal cortisol, but reduced the stress-activated cortisol response in older female offspring (30 to 42 months); males were not tested (42). This suggests a strong influence of age on long-term programming outcomes, but also that there may be differences between the programming effects of dexamethasone and betamethasone.

In rats, daily administration of antenatal sGC over the last week of gestation led to decreased basal corticosterone in male offspring (4 weeks), with no difference at 7 and 10 weeks of age (43). At 7 and 10 weeks, there was a prolonged corticosterone response to stress in animals prenatally exposed to sGC. In other studies in adult offspring, multiple antenatal sGC treatment resulted in increased basal corticosterone levels in male and female offspring and elevated corticosterone responsiveness to stress in females, but not males (44, 45). A recent study in mice has shown that prenatal corticosterone exposure results in age-dependent dysregulation of adrenal function (including increased basal corticosterone) and altered

adrenal morphology in male offspring, with no effect in females (46).

### **Prenatal adversity: offspring behavior**

Prenatal stress has been linked to increased risk for conduct disorder, anxiety disorders, attention deficit hyperactivity disorder, reduced cognitive performance, and schizophrenia; in many cases, effects are sex-specific (47). In humans, maternal prenatal cortisol concentrations (32 weeks' gestation) can predict infant emotionality in a sex-dependent manner. Female infants (5 weeks) born to mothers with high waking cortisol exhibited negative emotionality; male infants were less affected (48). Another study found that prenatal depressive symptoms associated with increased *Nr3c1* 1F DNA methylation in boys and decreased brain derived neurotrophic factor IV DNA methylation in boys and girls in buccal samples collected at 2 months of age (49). There was no association between maternal cortisol levels and infant DNA methylation, suggesting that the effect of maternal depression on epigenetic modifications is not mediated directly by glucocorticoids (49). Studies on the Growing Up in Singapore Towards Health Outcomes cohort have demonstrated that maternal anxiety during pregnancy is linked to structural alterations in cortico-limbic brain regions associated with anxiety-related phenotypes, including behavioral inhibition (50, 51); interestingly, there was interaction with *COMT* haplotypes (52).

Several recent studies have identified potential routes by which maternal stress in pregnancy influences neurodevelopmental and behavioral outcomes. Increased neurosteroid levels in late gestation protect the fetal brain from hypoxic insult and promote normal neurodevelopment. Prenatal stress in guinea pigs reduces neurosteroid production and sensitivity, as well as reducing myelination and modifying behavior (53). Other studies in newborn and young lambs (1 month) have shown that prenatal stress increases dendritic spine density in the hippocampus and prefrontal cortex (54, 55), and that this is associated with negative affective state, increased fear reactions and impaired cognition (56).

As alluded to previously, it is important to consider the role of genetic variation in the interaction between early environment and long term outcome. Although maternal prenatal anxiety, depression, and stress results in increased internalizing behaviors, not all children are affected. Different brain derived neurotrophic factor polymorphisms may account for this altered individual vulnerability to prenatal anxiety on internalizing behaviors (57). Further, another recent study linking maternal prenatal anxiety to attention deficit hyperactivity

disorder identified a strong interaction with variation in the *COMT* gene (58).

### **Prenatal glucocorticoid exposure: offspring behavior**

Antenatal sGC exposure affects neurodevelopmental outcomes and behaviors in animal and human studies (7). As discussed previously, prematurity represents a major risk factor for poor neurodevelopmental outcomes. As such, many of the studies describing the long-term effects of sGC exposure on behaviors in humans are confounded by prematurity. Early studies identified increased risk of behavioral disturbances including attentional problems, hyperactivity, and neurodevelopmental anomalies in children that had been exposed to repeated courses of antenatal sGC (59, 60). Relatively few human studies have considered the impact of sGC exposure in children born at term. In children (ages 6 to 10 years) who were born at term and had been exposed to single-course sGC, there were decreases in thickness of the anterior cingulate cortex, an area known to be involved in affective disorders (61). Interestingly, a subsequent study has shown a substantial interaction between prenatal sGC exposure and postnatal sociodemographic adversity. Children exposed to antenatal sGC (born at term) and postnatal socioeconomic adversity demonstrated impaired memory performance, whereas those that were exposed to sGC only with no postnatal adversity showed no impairment of memory function (62). A recent follow-up from one of the largest clinical trials comparing the effect of single vs multiple course sGC exposure on childhood outcomes, identified increased incidence of neurosensory deficits in children (age 5 years) exposed to multiple sGC in the subgroup (~30%) that were born at normal term (63).

Recent animal studies have begun to identify routes by which antenatal sGC affect neurodevelopmental outcomes and behaviors. Maternal sGC exposure decreased the neurosteroid allopregnanolone and myelination in the fetal sheep brain (64, 65). In the fetal rat brain, sGC exposure resulted in decreased PVN volume and cell number, although only female fetuses were assessed (66). Other recent studies have shown antenatal sGC exposure to increase expression of drug transporters and tight junction proteins in endothelial cells of the developing blood-brain barrier in the guinea pig (67, 68). The latter will directly affect the transport of factors across the fetal blood-brain barrier, which may in turn affect brain development.

In adult male rat offspring, prenatal sGC exposure reduced the length of astroglial processes in the hippocampus (69) as well as decreasing dendritic outgrowth in dentate granule cells, impairing spatial memory and increasing anxiety-like behaviors in male rat offspring

(70, 71). In contrast, in other studies, prenatal sGC altered hippocampal morphology and reduced levels of hippocampal *reelin* (*Reln*) and *glutamate decarboxylase 1* (*Gad1*) mRNA (72), but did not affect spatial memory and anxiety-like behavior; again, only males were investigated (72, 73). Indeed, in one study, prenatal sGC exposure was associated with an increase in cognitive flexibility and adaptability (73). These studies highlight the variable behavioral outcomes associated with prenatal sGC exposure, likely a result of different treatment and testing paradigms. However, they also highlight that the majority of studies have only considered outcomes in male offspring. In this regard, a recent study demonstrated that antenatal sGC increased anxiety and depressive-like behaviors in females but not in males, and that these effects were associated with altered function of the central serotonin system (74). Hence, it is critical to consider the effect of sex in these studies.

### Transgenerational Influences of Stress and Glucocorticoids on HPA Function and Behaviors

Recent focus has been placed on the potential transgenerational influences of early adversity and sGC on HPA function and stress-related behaviors. Studies have investigated the effects of maternal exposures during pregnancy on outcomes across multiple generations as well as maternal and paternal exposures before pregnancy on HPA function and related behaviors in the next generation. Other studies have focused on transgenerational influences of other environmental challenges including undernutrition, overnutrition, and endocrine disruptors, but these are outside the scope of the current review.

#### Transgenerational outcomes: maternal exposures

In rats, social stress during pregnancy resulted in adult F2 female offspring that exhibited increased HPA responses to stress following maternal transmission (75). These changes were associated with an increase in *Crb* mRNA in the PVN and decreased *Nr3c1* and *Nr3c2* mRNA in the hippocampus, suggesting reduced glucocorticoid feedback sensitivity. In contrast, in males, HPA responses to acute stress were attenuated and this was linked to elevated hippocampal *Nr3c1* mRNA (75).

In the guinea pig, antenatal sGC exposure was associated with decreased stress-activated HPA function and modified glucocorticoid sensitivity in F2 juvenile and adult offspring following maternal transmission (76). Decreased HPA responsiveness was associated

with a reduction in anterior pituitary *Pomc* mRNA levels and ACTH content, together with decreased *Crhr1* mRNA; the latter suggests reduced pituitary sensitivity to CRH (76). Interestingly, molecular effects in the pituitary were greater in females than males. In another study in sheep, single-course sGC resulted in increased basal HPA function but a reduction in stimulated HPA function in F2 female offspring following maternal transmission; male offspring were not investigated (42). In a recent study in guinea pigs, antenatal treatment with multiple courses of sGC led to transgenerational effects on HPA function across three generations via both maternal and paternal transmission (35). This was associated with extensive transgenerational changes in gene expression in the hypothalamic PVN, including gene networks linked diabetes, thermoregulation, and collagen formation; transmission was sex- and generation-dependent (35).

Several studies have described effects of environmental exposures on transgenerational behavioral outcomes; the majority has been undertaken in rats (77). A recent study has shown that prenatal stress results in increased anxiety-like behavior in adult F2 male offspring following maternal transmission, with little effect in females (75). Heightened anxiety in the F2 males born to prenatally stressed grandmothers was associated with increased *Crb* mRNA in the amygdala as well as modified *Crhr1* and *Crhr2* mRNA (75). In this study, there was no effect of grandmaternal social stress on depressive-like behaviors. A recent study has shown that multiple courses of sGC lead to profound effects on open-field locomotor activity in juvenile preweanling guinea pig offspring across multiple generations (35). Importantly, effects were confined to F2 and F3 female offspring following paternal transmission; there were no transgenerational effects of sGC on locomotor activity in male offspring or in male and female offspring following maternal transmission. The same study demonstrated a reduction prepulse inhibition (sensorimotor gating, and an indicator of attention) in prepubertal female offspring after prenatal sGC, but again only after paternal transmission (35). It is clear that endocrine and behavioral outcomes in offspring following maternal prenatal stress and antenatal sGC exposure can pass across multiple generations. Further, the paternal route of transmission, following the initial maternal exposure, can result in stronger phenotypes than maternal transmission.

Stress exposure before pregnancy may also have long-term consequences in offspring. Chronic stress in preadolescent females resulted in a substantial blunting of the corticosterone response to restraint stress during pregnancy (78). In another study, maternal stress before

pregnancy modified spine number and dendritic length in the anterior cingulate and prelimbic/infralimbic regions in rat offspring. The nature and extent of effects was dependent on the temporal proximity of adversity to pregnancy and was sex-specific (79). In the former study, modified HPA responsivity to stress during pregnancy likely results in altered fetal exposure to glucocorticoid and may indirectly influence development of the fetal HPA axis, stress responsiveness, and related behaviors.

### **Transgenerational outcomes: paternal exposures**

Recent studies have investigated the effects of paternal stress prior to breeding on HPA function and related behaviors in offspring (6). Exposure of male mice to chronic stress (6 weeks) during the peripubertal period, or in adulthood, resulted in offspring with a reduced HPA response to acute stress; adult male and female offspring were affected (80). Gene set enrichment analysis following RNA-sequencing in the hypothalamic PVN of offspring revealed substantial changes in gene transcription, including increased expression of glucocorticoid sensitivity genes (80). Little is known concerning the roles of paternal stress on HPA outcomes in other species. In the rhesus macaque, early separation of fathers in juvenile life resulted in mixed sex infant offspring (3 to 4 months) that exhibited increased stress-activated cortisol secretion and increased emotionality (81). A single study in humans found no association between paternal prenatal anxiety and adolescent cortisol levels (14). However, follow-up of children of Holocaust survivors with posttraumatic stress disorder (PTSD) revealed reduced basal cortisol levels and increased glucocorticoid sensitivity (82, 83).

Paternal stress and glucocorticoid exposure have also been shown to impact behaviors and related brain structures. Males subjected to postnatal traumatic stress sire F1 offspring that exhibit impaired long-term memory and altered synaptic plasticity (84), but improved behavioral flexibility (85). In contrast, exposure of male mice to chronic stress (6 weeks) during the peripubertal period, or in adulthood, did not affect behavior in F1 offspring (prepulse inhibition, tail suspension test, Barnes maze, and light-dark box) (80). Treatment of adult mice with corticosterone (4 weeks) before mating resulted in male F1 offspring that exhibited hyperactivity and increased anxiety-like behavior and female F1 offspring that exhibited impaired memory retention and altered fear extinction (86, 87). In F2, both male and female offspring displayed reduced anxiety-like behavior and males exhibited a depression-like phenotype (87). Together, these studies indicate an interaction between the paternal environment and offspring HPA function and behaviors across multiple generations.

## **Epigenetic Mechanisms of Developmental Programming**

Epigenetic modifications are associated with the effects of prenatal stress, glucocorticoids, and the developmental programming of HPA function, although our understanding of the mechanisms involved remains limited. Emerging areas of research include genome-wide analyses of DNA methylation modifications (conventionally referred to as DNA methylation) and small noncoding RNAs as vectors for intergenerational and transgenerational transmission of epigenetic effects. Epigenetic signatures are to some extent tissue-specific, and only a few studies to date have examined the correspondence between central and peripheral signatures as a function of maternal adversity and glucocorticoid exposure (88–91).

### **Prenatal adversity: epigenetic mechanisms**

Since earlier reports implicating DNA methylation of the *Nr3c1* gene in the impacts of maternal mood on offspring cortisol (92) and childhood adversity on *Nr3c1* 1F promoter methylation in the brain (93), several studies have reported increased DNA methylation of *Nr3c1* promoter variants in maternal stress in humans (94–98). Prenatal stress exposure as a result of chronic or war trauma stress was associated with differential DNA methylation in a number of genes within the HPA axis, including *Crh*, *Crhbp*, *Nr3c1*, and *FKBP5* in placenta and *Crh* and *Nr3c1* in cord blood (99). Exposure to war trauma leading to PTSD during pregnancy was associated with lower cortisol and *Nr3c1* levels and higher DNA methylation in the *Nr3c1* 1F promoter in peripheral blood of their children who were examined in adolescence (100). The offspring of survivors of the Holocaust born after World War II (examined at a mean age of 57.2) showed a moderation of PTSD effects depending on the affected parent, with lower *Nr3c1* 1F promoter methylation in offspring with both maternal and paternal PTSD and higher *Nr3c1* 1F promoter methylation with paternal-only PTSD (98). A meta-analysis combining data from 977 individuals found a substantial correlation between prenatal stress and the methylation status of *Nr3c1* 1F, supporting the association between prenatal stress and the methylation status of specific CpG sites within the *Nr3c1* promoter (101). These data support several studies in animal models indicating prenatal stress effects on *Nr3c1* promoter DNA methylation (102).

A few genome-wide analyses of maternal stress effects on DNA methylation have been performed in humans. A recent study examining transgenerational transmission of epigenetic effects found that the methylation of 5 CpG sites in saliva from grandchildren associated with exposure of the grandmother to community or domestic

violence during pregnancy (103). A series of recent studies has explored DNA methylome modifications in response to a traumatic event experienced during pregnancy (caused by the 1998 Quebec Ice Storm) (104). T cells isolated from early adolescent children of stressed mothers showed DNA methylation modifications in hundreds of genes associated with objective and maternal cognitive appraisal of the event, which were enriched predominantly in immune annotations. Differential DNA methylation of 33 genes in T cells was also enriched in genes associated with immune system function in neonates and hippocampi of adult males exposed to nonmedicated maternal depression (88). Similarly, nonmedicated maternal anxiety/depression was associated with differential DNA methylation in 42 CpG sites relative to controls in cord blood (105). However, data combining two large independent population-based samples from the Generation R Study and the Avon Longitudinal Study of Parents and Children ( $n = 1740$ ) revealed no major CpGs associated with a normative range of prenatal stressors (*i.e.*, nontraumatic) in cord blood. It appears likely that the type, severity, and timing of exposure are crucial factors determining the degree of epigenetic plasticity associated with prenatal stress (106). To our knowledge, no genome-wide epigenetic study of maternal stress has been performed in animal models.

### **Prenatal glucocorticoid exposure: epigenetic mechanisms**

To date, no study has examined the impact of sGC on DNA methylation modifications in humans; however, recent studies in animal models have moved beyond candidate genes to examine epigenome-wide responses to prenatal sGC exposure. A series of studies has examined the effects of multiple course prenatal exposure to sGC in guinea pigs on epigenetic modifications and gene regulation. Global levels of DNA methylation assessed 14 days after the final treatment (gd65) varied by tissue type, but all tissues examined (liver, adrenal, kidney, and cerebellum) were hypomethylated in F1 and F2 adults. At each time point examined, the magnitude of the effect of sGC varied by tissue type and was associated with the differential expression of epigenetic regulators (107). In the hippocampus, sGC exposure altered DNA methylation in hundreds of gene promoters at gd65 (108, 109). However, different sets of genes showed epigenetic alterations acutely after the final exposure, indicating a protracted time course of modifications possibly related to dynamic feedback activity among genes initially affected and their downstream targets. In these studies, only male offspring were examined. In a recent report using RNA-sequencing, prenatal glucocorticoid exposure altered gene expression in the PVN through the F3

generation together with HPA and hyperactivity consistent with developmental programming by sGC (35). Female offspring were more sensitive than males to the programming by sGC, with transmission occurring through the paternal line.

### **Paternal glucocorticoids and prenatal stress: mechanisms**

Given the accumulating data reviewed indicating a paternal impact on offspring stress vulnerability, there has been great interest in elucidating mechanisms that may convey intergenerational and transgenerational inheritance through the paternal germline [as opposed to transgenerational transmission of epigenetic effects (110)]. Some investigations have examined the potential involvement of DNA methylation in sperm, including at specific genes underlying stress-related odor conditioning (111). Sensitivity to stress in adulthood in a model of maternal separation and maternal stress was associated with decreased DNA methylation of the hippocampal *Nr3c1* promoter in F1 offspring, and methylation in some CpGs normalized after environmental enrichment in the sperm of male offspring and the hippocampus of F2 males (112). Exposure to sGC in adult male mice was associated with increased global DNA methylation 60 days later in sperm (113). Their male offspring also showed a selective decrease in methylation in regulatory regions of the promoters of *Nr3c2*, *Nr3c1*, and *Esr1* (encodes estrogen receptor  $\alpha$ ) in kidney at postnatal day 50. Precisely how epigenetic information may be transferred via DNA methylation modifications and maintained in the face of global demethylation of the male pronucleus, which occurs shortly after fertilization, is not well understood (114). Imprinted genes, which escape reprogramming and show parent-of-origin effects on transcription are rare; however, recent DNA motif analysis and analyses of allele-specific methylation patterns has indicated that many more showing monoallelic DNA methylation patterns appear to exist, particularly in brain (115).

Another recent focus is on small noncoding RNAs, which are abundant in mature sperm and play a role in posttranscriptional regulation of gene expression. Male offspring in a mouse model of maternal separation and maternal unpredictable stress showed differential microRNA (miRNA) expression in sperm (116). Importantly, injection of sperm RNAs from the stressed males was sufficient to reproduce metabolic and behavioral outcomes associated with stress. These data indicate that small noncoding RNAs are sensitive to early traumatic stress. The expression of nine miRNAs was increased in sperm after 6 weeks of chronic stress before breeding, with offspring showing altered transcription in PVN and the bed nucleus of stria terminalis (80).



Microinjection of zygotes with these nine miRNAs recapitulated the effects of paternal stress, long-term programming of transcription in the hypothalamus, and a blunted HPA response to stress (117). These studies implicate small noncoding RNAs in behavioral and physiological changes related to prenatal stress, likely as a result of altered neurodevelopment during embryogenesis.

## Mechanisms of Programming: Caveats and Perspectives

The primary focus of experiments to date, particularly in animal models, has been analysis of long-term changes in HPA responses and associated behavior with developmental programming, with offspring typically examined in adulthood; however, the studies reviewed here underline the importance of understanding the relationship between initial phenotypes and later life phenotypes. Examining epigenetic mechanisms proximal to the time of initial exposure and across developmental milestones has important implications for interpretation of later molecular phenotypes for at least two reasons: 1) the initial insult may induce pathophysiological outcomes that impair HPA function as early as the time of exposure and/or 2) the initial exposures may lead to cellular reprogramming (presumably via epigenetic mechanisms) that “prime” differential responses to the same environmental conditions later on that *then* lead to pathology

(Fig. 2). Hence, examining both early and later life time points are needed to disambiguate these alternatives. This issue highlights the importance of animal models in developing hypotheses that can be examined in humans. At the same time, it will be critically important that information from studies in humans is used to assess the extent to which animal models provide useful phenotypes that recapitulate not only phenotypic outcomes but epigenetic signatures. As such, human data can be used to model specific outcomes that can then be examined in animal models to assess their external validity.

Given this, it is important to identify developmental programming effects on hormone activity, post-translational modifications to nonhistone proteins, and cell proportion changes, which may not reflect true epigenetic reprogramming events (118). With respect to investigations of transgenerational gametic transmission, the possible role of genetic selection, or the behavioral transmission of epigenetic effects, including of paternal stress effects in rodents (119), should not be discounted. Longitudinal analyses can help determine the extent to which exposures lead to permanent epigenetic modifications, the stability of those modifications over time, and the extent to which these modifications arise later on, which can prime differential responses to later exposures. For example, the mediating effects of parental care also lead to differential response to later life stress (120). Other factors that should be considered include possible

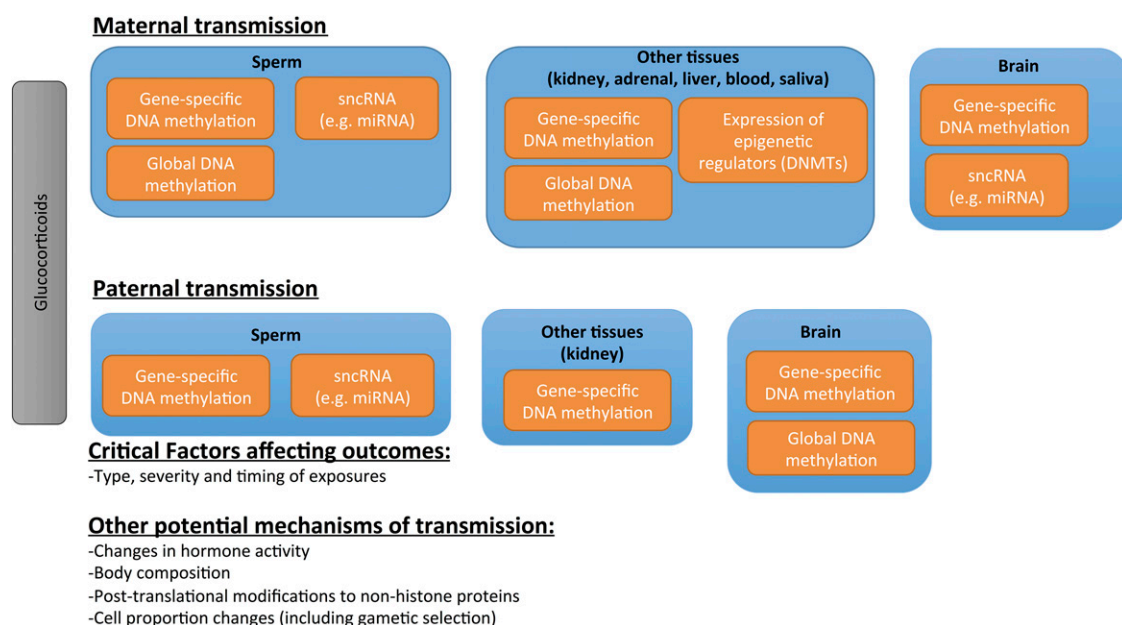

**Figure 2.** Mechanisms of programming by prenatal glucocorticoid exposure discussed in this review. Blue boxes refer to offspring tissues affected by parental exposures transmitted along the maternal or paternal line. Recent studies have reported epigenetic modifications in offspring with both maternal and paternal exposures to glucocorticoids in the (grand)parent generation. Notably, the specific genes affected are highly sex-specific, yet modifications to similar classes of epigenetic mechanisms in offspring [DNA methylation, small noncoding RNA (sncRNA); orange boxes] have been reported via both maternal and paternal transmission, affecting gametes, peripheral tissues, and the central nervous system of offspring. Factors affecting specific outcomes of prenatal glucocorticoid exposure are listed, as are potential alternative explanations for outcomes that may not involve direct effects of epigenetic reprogramming. DNMT, DNA methyltransferase.

role of microbiota in modifying trajectories of stress exposures (121) and, relatedly, the role of diet and body composition that interact with stress physiology (122, 123). In considering the relationship between epigenetic modifications and functional outcomes, epigenetic modifications such as DNA methylation are not only associated with active functional changes in gene expression but, perhaps more commonly, lead to genes *poised* for differential transcription (124). Histone modifications affecting DNA accessibility and nucleosome positioning may also be involved. Examining epigenetic modifications and gene expression in the context of challenge conditions (*e.g.*, the TSST described previously) can be informative in elucidating the association between epigenetic modifications and functional outcomes. In this sense, repeated stress responses may potentiate deleterious outcomes, whereas interventions that buffer stress, such as environmental enrichment, may mitigate them (112); the threshold may depend upon epigenetic potentiation. Ultimately, detailed analyses of the binding of transcription factors, the drivers of transcriptional regulation, will be needed for a mechanistic understanding of the role of epigenetic modifications.

## Conclusions

Understanding the long-term consequences of parental (maternal and paternal) adversity and glucocorticoid exposure on stress endocrinology and related behaviors in offspring is critical. Parental depression and anxiety are prevalent and use of sGC in the management of preterm birth will likely increase with adoption of recent guidelines focused around decreasing infant morbidity and mortality (24). Development is a continuum and it is becoming clear that an early exposure can lead to an altered developmental trajectory that, in turn, influences interactions between the individual and the environment after birth and indeed throughout life. To date, by far the majority of studies in this field have confined follow-up analysis to adult male offspring; however, there are major sex and age differences in outcomes, and these need to be carefully addressed in future studies. Emerging evidence suggests that the impact of early exposures is transmitted across multiple generations via both the maternal and paternal lineage. The mechanisms by which this occurs represents a major ongoing research focus. The physiological consequences of such transmission and implications for long-term population health are of considerable importance. Recent studies also suggest that paternal preconception exposures may be as effective as antenatal exposures in programming endocrine function and behaviors in offspring. Improved knowledge of the mechanisms by which adversity and glucocorticoid program

the fetus and neonate will allow development of strategies to ameliorate and/or reverse these effects and thus prevent long-term poor health outcomes. Such knowledge will also potentially allow the identification of individuals at risk for poor developmental outcomes for whom early intervention is most effective.

## Acknowledgments

The authors thank Wilfred C. de Vega for assistance with the preparation of Fig. 1.

**Correspondence:** Patrick O. McGowan, PhD, Biological Sciences, University of Toronto, Scarborough Campus, 1265 Military Trail, Toronto, Ontario M1C 1A4, Canada. E-mail: [patrick.mcgowan@utoronto.ca](mailto:patrick.mcgowan@utoronto.ca).

**Disclosure Summary:** The authors have nothing to disclose.

## References

1. Purisch SE, Gyamfi-Bannerman C. Epidemiology of preterm birth. *Semin Perinatol*. 2017;**41**(7):387–391.
2. Rakers F, Rupperecht S, Dreiling M, Bergmeier C, Witte OW, Schwab M. Transfer of maternal psychosocial stress to the fetus [published online ahead of print February 22, 2017]. *Neurosci Biobehav Rev*. doi: S0149-7634(16)30719-9.
3. de Kloet ER, Joëls M, Holsboer F. Stress and the brain: from adaptation to disease. *Nat Rev Neurosci*. 2005;**6**(6):463–475.
4. Groeneweg FL, Karst H, de Kloet ER, Joëls M. Rapid nongenomic effects of corticosteroids and their role in the central stress response. *J Endocrinol*. 2011;**209**(2):153–167.
5. Joëls M, Karst H, DeRijk R, de Kloet ER. The coming out of the brain mineralocorticoid receptor. *Trends Neurosci*. 2008;**31**(1): 1–7.
6. Bale TL. Epigenetic and transgenerational reprogramming of brain development. *Nat Rev Neurosci*. 2015;**16**(6):332–344.
7. Moisiadis VG, Matthews SG. Glucocorticoids and fetal programming part 1: outcomes. *Nat Rev Endocrinol*. 2014;**10**(7): 391–402.
8. Murphy SE, Braithwaite EC, Hubbard I, Williams KV, Tindall E, Holmes EA, Ramchandani PG. Salivary cortisol response to infant distress in pregnant women with depressive symptoms. *Arch Womens Ment Health*. 2015;**18**(2):247–253.
9. Davis EP, Glynn LM, Waffarn F, Sandman CA. Prenatal maternal stress programs infant stress regulation. *J Child Psychol Psychiatry*. 2011;**52**(2):119–129.
10. Tollenaar MS, Beijers R, Jansen J, Riksen-Walraven JM, de Weerth C. Maternal prenatal stress and cortisol reactivity to stressors in human infants. *Stress*. 2011;**14**(1):53–65.
11. Capron L, Glover V, Ramchandani P. Does maternal antenatal depression alter infant hypothalamic-pituitary-adrenal (HPA) axis functioning in the offspring at 4 months postpartum? *Psychoneuroendocrinology*. 2015;**61**:33.
12. Yong Ping E, Laplante DP, Elgbeili G, Hillerier KM, Brunet A, O'Hara MW, King S. Prenatal maternal stress predicts stress reactivity at 2½ years of age: the Iowa Flood Study. *Psychoneuroendocrinology*. 2015;**56**:62–78.
13. Vedhara K, Metcalfe C, Brant H, Crown A, Northstone K, Dawe K, Lightman S, Smith GD. Maternal mood and neuroendocrine programming: effects of time of exposure and sex. *J Neuroendocrinol*. 2012;**24**(7):999–1011.
14. O'Donnell KJ, Glover V, Jenkins J, Browne D, Ben-Shlomo Y, Golding J, O'Connor TG. Prenatal maternal mood is associated with

- altered diurnal cortisol in adolescence. *Psychoneuroendocrinology*. 2013;38(9):1630–1638.
15. Coe CL, Kramer M, Czéh B, Gould E, Reeves AJ, Kirschbaum C, Fuchs E. Prenatal stress diminishes neurogenesis in the dentate gyrus of juvenile rhesus monkeys. *Biol Psychiatry*. 2003;54(10):1025–1034.
  16. Murray CM, Stanton MA, Wellens KR, Santymire RM, Heintz MR, Lonsdorf EV. Maternal effects on offspring stress physiology in wild chimpanzees [published online ahead of print January 12, 2016]. *Am J Primatol*.
  17. Kapoor A, Matthews SG. Short periods of prenatal stress affect growth, behaviour and hypothalamo-pituitary-adrenal axis activity in male guinea pig offspring. *J Physiol*. 2005;566(Pt 3):967–977.
  18. Kapoor A, Matthews SG. Prenatal stress modifies behavior and hypothalamic-pituitary-adrenal function in female guinea pig offspring: effects of timing of prenatal stress and stage of reproductive cycle. *Endocrinology*. 2008;149(12):6406–6415.
  19. Green MK, Rani CS, Joshi A, Soto-Piña AE, Martinez PA, Frazer A, Strong R, Morilak DA. Prenatal stress induces long term stress vulnerability, compromising stress response systems in the brain and impairing extinction of conditioned fear after adult stress. *Neuroscience*. 2011;192:438–451.
  20. Brunton PJ, Russell JA. Prenatal social stress in the rat programmes neuroendocrine and behavioural responses to stress in the adult offspring: sex-specific effects. *J Neuroendocrinol*. 2010;22(4):258–271.
  21. St-Cyr S, Abuaiash S, Sivanathan S, McGowan PO. Maternal programming of sex-specific responses to predator odor stress in adult rats. *Horm Behav*. 2017;94:1–12.
  22. Murphy KE, Hannah ME, Willan AR, Hewson SA, Ohlsson A, Kelly EN, Matthews SG, Saigal S, Asztalos E, Ross S, Delisle MF, Amankwah K, Guselle P, Gafni A, Lee SK, Armson BA; MACS Collaborative Group. Multiple courses of antenatal corticosteroids for preterm birth (MACS): a randomised controlled trial. *Lancet*. 2008;372(9656):2143–2151.
  23. National Institutes of Health Consensus Development Panel. Antenatal corticosteroids revisited: repeat courses - National Institutes of Health Consensus Development Conference Statement, August 17-18, 2000. *Obstet Gynecol*. 2001;98(1):144–150.
  24. Committee on Obstetric Practice. Committee Opinion No. 713: antenatal corticosteroid therapy for fetal maturation. *Obstet Gynecol*. 2017;130(2):e102–e109.
  25. Davis EP, Waffarn F, Sandman CA. Prenatal treatment with glucocorticoids sensitizes the hpa axis response to stress among full-term infants. *Dev Psychobiol*. 2011;53(2):175–183.
  26. Gover A, Brummelte S, Synnes AR, Miller SP, Brant R, Weinberg J, Grunau RE. Single course of antenatal steroids did not alter cortisol in preterm infants up to 18 months. *Acta Paediatr*. 2012;101(6):604–608.
  27. Alexander N, Rosenlöcher F, Stalder T, Linke J, Distler W, Morgner J, Kirschbaum C. Impact of antenatal synthetic glucocorticoid exposure on endocrine stress reactivity in term-born children. *J Clin Endocrinol Metab*. 2012;97(10):3538–3544.
  28. Erni K, Shaqiri-Emini L, La Marca R, Zimmermann R, Ehlert U. Psychobiological effects of prenatal glucocorticoid exposure in 10-year-old-children. *Front Psychiatry*. 2012;3:104.
  29. Meuwese CL, Euser AM, Ballieux BE, van Vliet HA, Finken MJ, Walther FJ, Dekker FW, Wit JM. Growth-restricted preterm newborns are predisposed to functional adrenal hyperandrogenism in adult life. *Eur J Endocrinol*. 2010;163(4):681–689.
  30. Dalziel SR, Lim VK, Lambert A, McCarthy D, Parag V, Rodgers A, Harding JE. Antenatal exposure to betamethasone: psychological functioning and health related quality of life 31 years after inclusion in randomised controlled trial. *BMJ*. 2005;331(7518):665.
  31. Uno H, Eisele S, Sakai A, Shelton S, Baker E, DeJesus O, Holden J. Neurotoxicity of glucocorticoids in the primate brain. *Horm Behav*. 1994;28(4):336–348.
  32. de Vries A, Holmes MC, Heijnis A, Seier JV, Heerden J, Louw J, Wolfe-Coote S, Meaney MJ, Levitt NS, Seckl JR. Prenatal dexamethasone exposure induces changes in nonhuman primate offspring cardiometabolic and hypothalamic-pituitary-adrenal axis function. *J Clin Invest*. 2007;117(4):1058–1067.
  33. Hauser J, Knapman A, Zürcher NR, Pilloud S, Maier C, Diaz-Heijt R, Forssberg H, Dettling A, Feldon J, Pryce CR. Effects of prenatal dexamethasone treatment on physical growth, pituitary-adrenal hormones, and performance of motor, motivational, and cognitive tasks in juvenile and adolescent common marmoset monkeys. *Endocrinology*. 2008;149(12):6343–6355.
  34. Dean F, Yu C, Lingas RI, Matthews SG. Prenatal glucocorticoid modifies hypothalamo-pituitary-adrenal regulation in prepubertal guinea pigs. *Neuroendocrinology*. 2001;73(3):194–202.
  35. Moisiadis VG, Constantinof A, Kostaki A, Szyf M, Matthews SG. Prenatal glucocorticoid exposure modifies endocrine function and behaviour for 3 generations following maternal and paternal transmission. *Sci Rep*. 2017;7(1):11814.
  36. Owen D, Matthews SG. Prenatal glucocorticoid exposure alters hypothalamo-pituitary-adrenal function in juvenile guinea pigs. *J Neuroendocrinol*. 2007;19(3):172–180.
  37. Liu L, Li A, Matthews SG. Maternal glucocorticoid treatment programs HPA regulation in adult offspring: sex-specific effects. *Am J Physiol Endocrinol Metab*. 2001;280(5):E729–E739.
  38. Dunn E, Kapoor A, Leen J, Matthews SG. Prenatal synthetic glucocorticoid exposure alters hypothalamic-pituitary-adrenal regulation and pregnancy outcomes in mature female guinea pigs. *J Physiol*. 2010;588(Pt 5):887–899.
  39. Li S, Nitsos I, Polglase GR, Braun T, Moss TJ, Newnham JP, Challis JR. The effects of dexamethasone treatment in early gestation on hypothalamic-pituitary-adrenal responses and gene expression at 7 months of postnatal age in sheep. *Reprod Sci*. 2012;19(3):260–270.
  40. Sloboda DM, Moss TJ, Gurrin LC, Newnham JP, Challis JR. The effect of prenatal betamethasone administration on postnatal ovine hypothalamic-pituitary-adrenal function. *J Endocrinol*. 2002;172(1):71–81.
  41. Sloboda DM, Moss TJ, Li S, Doherty D, Nitsos I, Challis JR, Newnham JP. Prenatal betamethasone exposure results in pituitary-adrenal hyporesponsiveness in adult sheep. *Am J Physiol Endocrinol Metab*. 2007;292(1):E61–E70.
  42. Long NM, Ford SP, Nathanielsz PW. Multigenerational effects of fetal dexamethasone exposure on the hypothalamic-pituitary-adrenal axis of first- and second-generation female offspring. *Am J Obstet Gynecol*. 2013;208(3):217.e1–217.e8.
  43. Nagano M, Ozawa H, Suzuki H. Prenatal dexamethasone exposure affects anxiety-like behaviour and neuroendocrine systems in an age-dependent manner. *Neurosci Res*. 2008;60(4):364–371.
  44. Liu W, Xu Y, Lu J, Zhang Y, Sheng H, Ni X. Swimming exercise ameliorates depression-like behaviors induced by prenatal exposure to glucocorticoids in rats. *Neurosci Lett*. 2012;524(2):119–123.
  45. Hauser J, Feldon J, Pryce CR. Direct and dam-mediated effects of prenatal dexamethasone on emotionality, cognition and HPA axis in adult Wistar rats. *Horm Behav*. 2009;56(4):364–375.
  46. Cuffe JS, Turton EL, Akison LK, Bielefeldt-Ohmann H, Moritz KM. Prenatal corticosterone exposure programs sex-specific adrenal adaptations in mouse offspring. *J Endocrinol*. 2017;232(1):37–48.
  47. Glover V. Prenatal stress and its effects on the fetus and the child: possible underlying biological mechanisms. *Adv Neurobiol*. 2015;10:269–283.
  48. Braithwaite EC, Pickles A, Sharp H, Glover V, O'Donnell KJ, Tibu F, Hill J. Maternal prenatal cortisol predicts infant negative emotionality in a sex-dependent manner. *Physiol Behav*. 2017;175:31–36.
  49. Braithwaite EC, Kundakovic M, Ramchandani PG, Murphy SE, Champagne FA. Maternal prenatal depressive symptoms predict

- infant NR3C1 1F and BDNF IV DNA methylation. *Epigenetics*. 2015;10(5):408–417.
50. Rifkin-Graboi A, Meaney MJ, Chen H, Bai J, Hameed WB, Tint MT, Broekman BF, Chong YS, Gluckman PD, Fortier MV, Qiu A. Antenatal maternal anxiety predicts variations in neural structures implicated in anxiety disorders in newborns. *J Am Acad Child Adolesc Psychiatry*. 2015;54(4):313–321.
  51. Qiu A, Rifkin-Graboi A, Chen H, Chong YS, Kwek K, Gluckman PD, Fortier MV, Meaney MJ. Maternal anxiety and infants' hippocampal development: timing matters. *Transl Psychiatry*. 2013;3(9):e306.
  52. Qiu A, Tuan TA, Ong ML, Li Y, Chen H, Rifkin-Graboi A, Broekman BF, Kwek K, Saw SM, Chong YS, Gluckman PD, Fortier MV, Holbrook JD, Meaney MJ. COMT haplotypes modulate associations of antenatal maternal anxiety and neonatal cortical morphology. *Am J Psychiatry*. 2015;172(2):163–172.
  53. Hirst JJ, Cumberland AL, Shaw JC, Bennett GA, Kelleher MA, Walker DW, Palliser HK. Loss of neurosteroid-mediated protection following stress during fetal life. *J Steroid Biochem Mol Biol*. 2016;160:181–188.
  54. Petit B, Boissy A, Zanella A, Chaillou E, Andanson S, Bes S, Lévy F, Coulon M. Stress during pregnancy alters dendritic spine density and gene expression in the brain of new-born lambs. *Behav Brain Res*. 2015;291:155–163.
  55. Coulon M, Wellman CL, Marjara IS, Janczak AM, Zanella AJ. Early adverse experience alters dendritic spine density and gene expression in prefrontal cortex and hippocampus in lambs. *Psychoneuroendocrinology*. 2013;38(7):1112–1121.
  56. Coulon M, Nowak R, Andanson S, Petit B, Lévy F, Boissy A. Effects of prenatal stress and emotional reactivity of the mother on emotional and cognitive abilities in lambs. *Dev Psychobiol*. 2015;57(5):626–636.
  57. O'Donnell KJ, Glover V, Holbrook JD, O'Connor TG. Maternal prenatal anxiety and child brain-derived neurotrophic factor (BDNF) genotype: effects on internalizing symptoms from 4 to 15 years of age. *Dev Psychopathol*. 2014;26(4 Pt 2):1255–1266.
  58. O'Donnell KJ, Glover V, Lahti J, Lahti M, Edgar RD, Räikkönen K, O'Connor TG. Maternal prenatal anxiety and child COMT genotype predict working memory and symptoms of ADHD. *PLoS One*. 2017;12(6):e0177506.
  59. French NP, Hagan R, Evans SF, Mullan A, Newnham JP. Repeated antenatal corticosteroids: effects on cerebral palsy and childhood behavior. *Am J Obstet Gynecol*. 2004;190(3):588–595.
  60. Crowther CA, Doyle LW, Haslam RR, Hiller JE, Harding JE, Robinson JS; ACTORDS Study Group. Outcomes at 2 years of age after repeat doses of antenatal corticosteroids. *N Engl J Med*. 2007;357(12):1179–1189.
  61. Davis EP, Sandman CA, Buss C, Wing DA, Head K. Fetal glucocorticoid exposure is associated with preadolescent brain development. *Biol Psychiatry*. 2013;74(9):647–655.
  62. Grant KA, Sandman CA, Wing DA, Dmitrieva J, Davis EP. Prenatal programming of postnatal susceptibility to memory impairments: a developmental double jeopardy. *Psychol Sci*. 2015;26(7):1054–1062.
  63. Asztalos E, Willan A, Murphy K, Matthews S, Ohlsson A, Saigal S, Armson A, Kelly E, Delisle MF, Gafni A, Lee S, Sananes R, Rovet J, Guselle P, Amankwah K; MACS-5 Collaborative Group. Association between gestational age at birth, antenatal corticosteroids, and outcomes at 5 years: multiple courses of antenatal corticosteroids for preterm birth study at 5 years of age (MACS-5). *BMC Pregnancy Childbirth*. 2014;14(1):272.
  64. Yawno T, Mortale M, Sutherland AE, Jenkin G, Wallace EM, Walker DW, Miller SL. The effects of betamethasone on allopregnanolone concentrations and brain development in preterm fetal sheep. *Neuropharmacology*. 2014;85:342–348.
  65. Sadowska GB, Stonestreet BS. Maternal treatment with glucocorticoids modulates gap junction protein expression in the ovine fetal brain. *Neuroscience*. 2014;275:248–258.
  66. Manojlović-Stojanoski M, Nestorović N, Trifunović S, Ristić N, Jarić I, Filipović B, Milošević V. Dexamethasone exposure affects paraventricular nucleus and pituitary corticotrophs in female rat fetuses: an unbiased stereological and immunohistochemical study. *Tissue Cell*. 2016;48(5):516–523.
  67. Iqbal M, Baello S, Javam M, Audette MC, Gibb W, Matthews SG. Regulation of multidrug resistance P-glycoprotein in the developing blood-brain barrier: interplay between glucocorticoids and cytokines. *J Neuroendocrinol*. 2016;28(3):12360.
  68. Baello S, Iqbal M, Kearney S, Kuthiala S, Bloise E, Gibb W, Matthews SG. Glucocorticoids modify effects of TGF- $\beta$ 1 on multidrug resistance in the fetal blood-brain barrier. *Growth Factors*. 2016;34(1-2):33–41.
  69. Shende VH, McArthur S, Gillies GE, Opacka-Juffry J. Astroglial plasticity is implicated in hippocampal remodelling in adult rats exposed to antenatal dexamethasone. *Neural Plast*. 2015;2015:694347.
  70. Bustamante C, Valencia M, Torres C, González MJ, Carvajal C, Sandoval D, Gutiérrez-Rojas C, Pascual R. Effects of a single course of prenatal betamethasone on dendritic development in dentate gyrus granular neurons and on spatial memory in rat offspring. *Neuropediatrics*. 2014;45(6):354–361.
  71. Pascual R, Valencia M, Bustamante C. Antenatal betamethasone produces protracted changes in anxiety-like behaviors and in the expression of microtubule-associated protein 2, brain-derived neurotrophic factor and the tyrosine kinase B receptor in the rat cerebellar cortex. *Int J Dev Neurosci*. 2015;43:78–85.
  72. Lui CC, Hsu MH, Kuo HC, Chen CC, Sheen JM, Yu HR, Tiao MM, Tain YL, Chang KA, Huang LT. Effects of melatonin on prenatal dexamethasone-induced epigenetic alterations in hippocampal morphology and reelin and glutamic acid decarboxylase 67 levels. *Dev Neurosci*. 2015;37(2):105–114.
  73. Zeng Y, Brydges NM, Wood ER, Drake AJ, Hall J. Prenatal glucocorticoid exposure in rats: programming effects on stress reactivity and cognition in adult offspring. *Stress*. 2015;18(3):353–361.
  74. Hiroi R, Carbone DL, Zuloaga DG, Bimonte-Nelson HA, Handa RJ. Sex-dependent programming effects of prenatal glucocorticoid treatment on the developing serotonin system and stress-related behaviors in adulthood. *Neuroscience*. 2016;320:43–56.
  75. Grundwald NJ, Brunton PJ. Prenatal stress programs neuroendocrine stress responses and affective behaviors in second generation rats in a sex-dependent manner. *Psychoneuroendocrinology*. 2015;62:204–216.
  76. Iqbal M, Moisiadis VG, Kostaki A, Matthews SG. Transgenerational effects of prenatal synthetic glucocorticoids on hypothalamic-pituitary-adrenal function. *Endocrinology*. 2012;153(7):3295–3307.
  77. Hochberg Z, Feil R, Constancia M, Fraga M, Junien C, Carel JC, Boileau P, Le Bouc Y, Deal CL, Lillycrop K, Scharfmann R, Sheppard A, Skinner M, Szyf M, Waterland RA, Waxman DJ, Whitelaw E, Ong K, Albertsson-Wikland K. Child health, developmental plasticity, and epigenetic programming. *Endocr Rev*. 2011;32(2):159–224.
  78. Morrison KE, Epperson CN, Sammel MD, Ewing G, Podcasy JS, Hantsoo L, Kim DR, Bale TL. Preadolescent adversity programs a disrupted maternal stress reactivity in humans and mice. *Biol Psychiatry*. 2017;81(8):693–701.
  79. Bock J, Poeschel J, Schindler J, Börner F, Shachar-Dadon A, Ferdman N, Gaisler-Salomon I, Leshem M, Braun K, Poeggel G. Transgenerational sex-specific impact of preconception stress on the development of dendritic spines and dendritic length in the medial prefrontal cortex. *Brain Struct Funct*. 2016;221(2):855–863.
  80. Rodgers AB, Morgan CP, Bronson SL, Revello S, Bale TL. Paternal stress exposure alters sperm microRNA content and reprograms offspring HPA stress axis regulation. *J Neurosci*. 2013;33(21):9003–9012.

81. Kinnally EL, Capitanio JP. Paternal early experiences influence infant development through non-social mechanisms in Rhesus macaques. *Front Zool.* 2015;12(Suppl 1):S14.
82. Lehrner A, Bierer LM, Passarelli V, Pratchett LC, Flory JD, Bader HN, Harris IR, Bedi A, Daskalakis NP, Makotkine I, Yehuda R. Maternal PTSD associates with greater glucocorticoid sensitivity in offspring of Holocaust survivors. *Psychoneuroendocrinology.* 2014;40:213–220.
83. Yehuda R, Teicher MH, Seckl JR, Grossman RA, Morris A, Bierer LM. Parental posttraumatic stress disorder as a vulnerability factor for low cortisol trait in offspring of holocaust survivors. *Arch Gen Psychiatry.* 2007;64(9):1040–1048.
84. Bohacek J, Farinelli M, Mirante O, Steiner G, Gapp K, Coiret G, Ebeling M, Durán-Pacheco G, Iniguez AL, Manuella F, Moreau JL, Mansuy IM. Pathological brain plasticity and cognition in the offspring of males subjected to postnatal traumatic stress. *Mol Psychiatry.* 2015;20(5):621–631.
85. Gapp K, Soldado-Magraner S, Alvarez-Sánchez M, Bohacek J, Vernaz G, Shu H, Franklin TB, Wolfer D, Mansuy IM. Early life stress in fathers improves behavioural flexibility in their offspring. *Nat Commun.* 2014;5:5466.
86. Yeshurun S, Rogers J, Short AK, Renoir T, Pang TY, Hannan AJ. Elevated paternal glucocorticoid exposure modifies memory retention in female offspring. *Psychoneuroendocrinology.* 2017;83:9–18.
87. Short AK, Fennell KA, Perreau VM, Fox A, O'Bryan MK, Kim JH, Bredy TW, Pang TY, Hannan AJ. Elevated paternal glucocorticoid exposure alters the small noncoding RNA profile in sperm and modifies anxiety and depressive phenotypes in the offspring. *Transl Psychiatry.* 2016;6(6):e837.
88. Nemoda Z, Massart R, Suderman M, Hallett M, Li T, Coote M, Cody N, Sun ZS, Soares CN, Turecki G, Steiner M, Szyf M. Maternal depression is associated with DNA methylation changes in cord blood T lymphocytes and adult hippocampi. *Transl Psychiatry.* 2015;5(4):e545.
89. Provençal N, Suderman MJ, Guillemin C, Massart R, Ruggiero A, Wang D, Bennett AJ, Pierre PJ, Friedman DP, Côté SM, Hallett M, Tremblay RE, Suomi SJ, Szyf M. The signature of maternal rearing in the methylome in rhesus macaque prefrontal cortex and T cells. *J Neurosci.* 2012;32(44):15626–15642.
90. Seifuddin F, Wand G, Cox O, Pirooznia M, Moody L, Yang X, Tai J, Boersma G, Tamashiro K, Zandi P, Lee R. Genome-wide methyl-seq analysis of blood-brain targets of glucocorticoid exposure. *Epigenetics.* 2017;12(8):637–652.
91. Kundakovic M, Gudsnek K, Herbstman JB, Tang D, Perera FP, Champagne FA. DNA methylation of BDNF as a biomarker of early-life adversity. *Proc Natl Acad Sci USA.* 2015;112(22):6807–6813.
92. Oberlander TF, Weinberg J, Papsdorf M, Grunau R, Misri S, Devlin AM. Prenatal exposure to maternal depression, neonatal methylation of human glucocorticoid receptor gene (NR3C1) and infant cortisol stress responses. *Epigenetics.* 2008;3(2):97–106.
93. McGowan PO, Sasaki A, D'Alessio AC, Dymov S, Labonté B, Szyf M, Turecki G, Meaney MJ. Epigenetic regulation of the glucocorticoid receptor in human brain associates with childhood abuse. *Nat Neurosci.* 2009;12(3):342–348.
94. Hompes T, Izzl B, Gellens E, Morreels M, Fieuws S, Pexsters A, Schops G, Dom M, Van Bree R, Freson K, Verhaeghe J, Spitz B, Demyttenaere K, Glover V, Van den Bergh B, Allegaert K, Claes S. Investigating the influence of maternal cortisol and emotional state during pregnancy on the DNA methylation status of the glucocorticoid receptor gene (NR3C1) promoter region in cord blood [published correction appears in *J Psychiatr Res.* 2014;56:165–167]. *J Psychiatr Res.* 2013;47(7):880–891.
95. Radtke KM, Ruf M, Gunter HM, Dohrmann K, Schauer M, Meyer A, Elbert T. Transgenerational impact of intimate partner violence on methylation in the promoter of the glucocorticoid receptor. *Transl Psychiatry.* 2011;1(7):e21.
96. Mulligan CJ, D'Errico NC, Stees J, Hughes DA. Methylation changes at NR3C1 in newborns associate with maternal prenatal stress exposure and newborn birth weight. *Epigenetics.* 2012;7(8):853–857.
97. Perroud N, Dayer A, Piguet C, Nallet A, Favre S, Malafosse A, Aubry JM. Childhood maltreatment and methylation of the glucocorticoid receptor gene NR3C1 in bipolar disorder [retraction published in *Br J Psychiatry.* 2014;205(2):164]. *Br J Psychiatry.* 2014;204(1):30–35.
98. Yehuda R, Daskalakis NP, Lehrner A, Desarnaud F, Bader HN, Makotkine I, Flory JD, Bierer LM, Meaney MJ. Influences of maternal and paternal PTSD on epigenetic regulation of the glucocorticoid receptor gene in Holocaust survivor offspring. *Am J Psychiatry.* 2014;171(8):872–880.
99. Kertes DA, Kamin HS, Hughes DA, Rodney NC, Bhatt S, Mulligan CJ. Prenatal maternal stress predicts methylation of genes regulating the hypothalamic-pituitary-adrenocortical system in mothers and newborns in the Democratic Republic of Congo. *Child Dev.* 2016;87(1):61–72.
100. Perroud N, Rutembesa E, Paoloni-Giacobino A, Mutabaruka J, Mutesa L, Stenz L, Malafosse A, Karege F. The Tutsi genocide and transgenerational transmission of maternal stress: epigenetics and biology of the HPA axis. *World J Biol Psychiatry.* 2014;15(4):334–345.
101. Palma-Gudiel H, Córdova-Palomera A, Eixarch E, Deuschle M, Fañanás L. Maternal psychosocial stress during pregnancy alters the epigenetic signature of the glucocorticoid receptor gene promoter in their offspring: a meta-analysis. *Epigenetics.* 2015;10(10):893–902.
102. Turecki G, Meaney MJ. Effects of the social environment and stress on glucocorticoid receptor gene methylation: a systematic review. *Biol Psychiatry.* 2016;79(2):87–96.
103. Serpeloni F, Radtke K, de Assis SG, Henning F, Nätt D, Elbert T. Grandmaternal stress during pregnancy and DNA methylation of the third generation: an epigenome-wide association study. *Transl Psychiatry.* 2017;7(8):e1202.
104. Cao-Lei L, Massart R, Suderman MJ, Machnes Z, Elgbeili G, Laplante DP, Szyf M, King S. DNA methylation signatures triggered by prenatal maternal stress exposure to a natural disaster: Project Ice Storm. *PLoS One.* 2014;9(9):e107653.
105. Non AL, Binder AM, Kubzansky LD, Michels KB. Genome-wide DNA methylation in neonates exposed to maternal depression, anxiety, or SSRI medication during pregnancy. *Epigenetics.* 2014;9(7):964–972.
106. Rijlaarsdam J, Pappa I, Walton E, Bakermans-Kranenburg MJ, Mileva-Seitz VR, Rippe RC, Roza SJ, Jaddoe VW, Verhulst FC, Felix JF, Cecil CA, Relton CL, Gaunt TR, McArdle W, Mill J, Barker ED, Tiemeier H, van IJzendoorn MH. An epigenome-wide association meta-analysis of prenatal maternal stress in neonates: a model approach for replication. *Epigenetics.* 2016;11(2):140–149.
107. Crudo A, Petropoulos S, Moisiadis VG, Iqbal M, Kostaki A, Machnes Z, Szyf M, Matthews SG. Prenatal synthetic glucocorticoid treatment changes DNA methylation states in male organ systems: multigenerational effects. *Endocrinology.* 2012;153(7):3269–3283.
108. Crudo A, Petropoulos S, Suderman M, Moisiadis VG, Kostaki A, Hallett M, Szyf M, Matthews SG. Effects of antenatal synthetic glucocorticoid on glucocorticoid receptor binding, DNA methylation, and genome-wide mRNA levels in the fetal male hippocampus. *Endocrinology.* 2013;154(11):4170–4181.
109. Crudo A, Suderman M, Moisiadis VG, Petropoulos S, Kostaki A, Hallett M, Szyf M, Matthews SG. Glucocorticoid programming of the fetal male hippocampal epigenome. *Endocrinology.* 2013;154(3):1168–1180.

110. Youngson NA, Whitelaw E. Transgenerational epigenetic effects. *Annu Rev Genomics Hum Genet.* 2008;**9**(1):233–257.
111. Dias BG, Ressler KJ. Parental olfactory experience influences behavior and neural structure in subsequent generations. *Nat Neurosci.* 2014;**17**(1):89–96.
112. Gapp K, Bohacek J, Grossmann J, Brunner AM, Manuella F, Nanni P, Mansuy IM. Potential of environmental enrichment to prevent transgenerational effects of paternal trauma. *Neuropsychopharmacology.* 2016;**41**(11):2749–2758.
113. Petropoulos S, Matthews SG, Szyf M. Adult glucocorticoid exposure leads to transcriptional and DNA methylation changes in nuclear steroid receptors in the hippocampus and kidney of mouse male offspring. *Biol Reprod.* 2014;**90**(2):43.
114. Heard E, Martienssen RA. Transgenerational epigenetic inheritance: myths and mechanisms. *Cell.* 2014;**157**(1):95–109.
115. Perez JD, Rubinstein ND, Dulac C. New perspectives on genomic imprinting, an essential and multifaceted mode of epigenetic control in the developing and adult brain. *Annu Rev Neurosci.* 2016;**39**(1):347–384.
116. Gapp K, Jawaid A, Sarkies P, Bohacek J, Pelczar P, Prados J, Farinelli L, Miska E, Mansuy IM. Implication of sperm RNAs in transgenerational inheritance of the effects of early trauma in mice. *Nat Neurosci.* 2014;**17**(5):667–669.
117. Rodgers AB, Morgan CP, Leu NA, Bale TL. Transgenerational epigenetic programming via sperm microRNA recapitulates effects of paternal stress. *Proc Natl Acad Sci USA.* 2015;**112**(44):13699–13704.
118. Lappalainen T, Grealis JM. Associating cellular epigenetic models with human phenotypes. *Nat Rev Genet.* 2017;**18**(7):441–451.
119. Dietz DM, Laplant Q, Watts EL, Hodes GE, Russo SJ, Feng J, Oosting RS, Vialou V, Nestler EJ. Paternal transmission of stress-induced pathologies. *Biol Psychiatry.* 2011;**70**(5):408–414.
120. Meaney MJ. Maternal care, gene expression, and the transmission of individual differences in stress reactivity across generations. *Annu Rev Neurosci.* 2001;**24**(1):1161–1192.
121. Jašarević E, Rodgers AB, Bale TL. A novel role for maternal stress and microbial transmission in early life programming and neurodevelopment. *Neurobiol Stress.* 2015;**1**:81–88.
122. Sasaki A, de Vega W, Sivanathan S, St-Cyr S, McGowan PO. Maternal high-fat diet alters anxiety behavior and glucocorticoid signaling in adolescent offspring. *Neuroscience.* 2014;**272**:92–101.
123. Sasaki A, de Vega WC, St-Cyr S, Pan P, McGowan PO. Perinatal high fat diet alters glucocorticoid signaling and anxiety behavior in adulthood. *Neuroscience.* 2013;**240**:1–12.
124. Schübeler D. Function and information content of DNA methylation. *Nature.* 2015;**517**(7534):321–326.
